# Supplementary material for: Accuracy and reliability of noninvasive stroke volume monitoring via ECG-gated 3D electrical impedance tomography in healthy volunteers
Source: PubMed Central journal article supplement (PMC5786320; doi:10.1371/journal.pone.0191870), 2018-01-26
Supplement: pone.0191870.s007.pdf [file pone.0191870.s007.pdf]

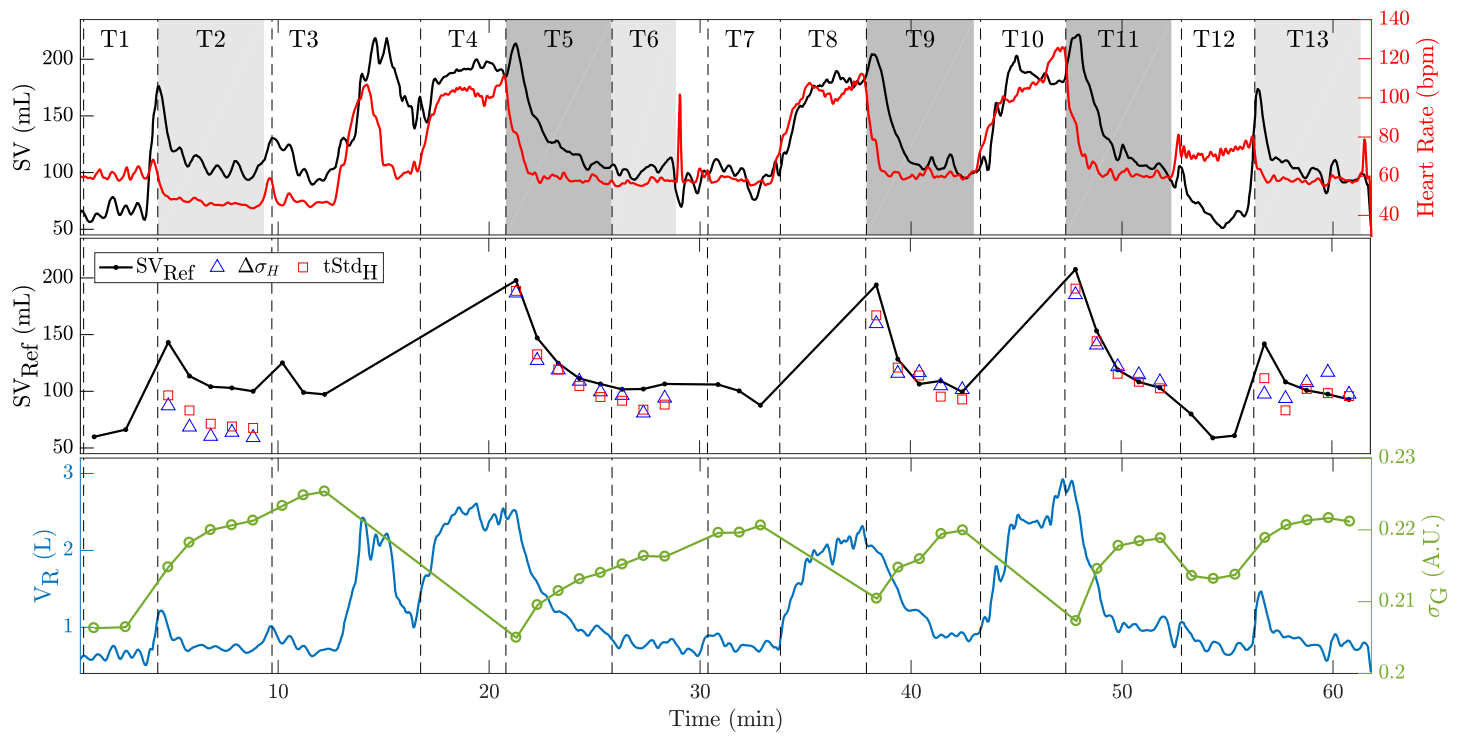

**Fig S7.** Temporal evolution of  $SV_{Ref}$ , heart rate and EIT-based features for subject S09. See caption of Fig. 9 for details.
