# Supplementary material for: Accuracy and reliability of noninvasive stroke volume monitoring via ECG-gated 3D electrical impedance tomography in healthy volunteers
Source: PubMed Central journal article supplement (PMC5786320; doi:10.1371/journal.pone.0191870), 2018-01-26
Supplement: pone.0191870.s009.pdf [file pone.0191870.s009.pdf]

**Table S1.** Subject-specific and overall performance for a selection of eight features (a) to (h) and hypothesis (H1) absolute SV via subject-independent calibration. The performance between  $SV_{\text{EIT}}$  and  $SV_{\text{Ref}}$  is evaluated in terms of absolute error  $\epsilon_{\text{Abs}}$  and correlation coefficient  $r$ . The (†) indicates unrealistic solutions with calibrations coefficients *not* having identical sign for all subjects. Cell shadings indicate whether the acceptance criteria (see methods section) are met (green), not met (red), or met but with unrealistic calibration coefficients (yellow).

|     | (a) $\Delta\sigma_{\text{H}}$ |         | (b) $t\text{Std}_{\text{H}}$                                                     |         | (c) $\Delta\sigma_{\text{L}}$                                                    |         | (d) $t\text{Std}_{\text{L}}$ |         |
|-----|-------------------------------|---------|----------------------------------------------------------------------------------|---------|----------------------------------------------------------------------------------|---------|------------------------------|---------|
|     | $\epsilon_{\text{Abs}}$ (mL)  | $r$ (1) | $\epsilon_{\text{Abs}}$ (mL)                                                     | $r$ (1) | $\epsilon_{\text{Abs}}$ (mL)                                                     | $r$ (1) | $\epsilon_{\text{Abs}}$ (mL) | $r$ (1) |
| S01 | 18.7 ± 18.0                   | 0.456   | 11.7 ± 17.8                                                                      | 0.358   | 21.6 ± 14.8                                                                      | 0.714   | 17.9 ± 17.9                  | 0.467   |
| S02 | -39.5 ± 11.0                  | 0.118   | -38.9 ± 12.6                                                                     | -0.144  | -37.2 ± 13.0                                                                     | -0.070  | -39.4 ± 11.9                 | -0.035  |
| S03 | -7.9 ± 16.2                   | 0.242   | -12.8 ± 17.0                                                                     | 0.102   | -9.1 ± 24.9                                                                      | -0.786  | -5.6 ± 21.3                  | -0.753  |
| S04 | 30.5 ± 23.9                   | 0.563   | 29.2 ± 23.4                                                                      | 0.426   | 30.6 ± 20.6                                                                      | 0.784   | 28.2 ± 24.3                  | 0.358   |
| S05 | 21.0 ± 23.1                   | 0.696   | 22.9 ± 19.2                                                                      | 0.778   | 16.6 ± 24.0                                                                      | 0.172   | 19.9 ± 25.9                  | -0.167  |
| S06 | -10.5 ± 18.1                  | 0.328   | -13.4 ± 17.1                                                                     | 0.417   | -3.6 ± 18.9                                                                      | 0.152   | -7.5 ± 18.3                  | 0.281   |
| S08 | -12.0 ± 20.9                  | 0.720   | -6.5 ± 15.2                                                                      | 0.958   | -11.1 ± 18.8                                                                     | 0.598   | -11.2 ± 20.4                 | 0.482   |
| S09 | 26.4 ± 15.8                   | 0.893   | 30.8 ± 12.5                                                                      | 0.935   | 18.5 ± 16.1                                                                      | 0.356   | 22.0 ± 16.6                  | 0.235   |
| S10 | 6.3 ± 12.6                    | 0.577   | 5.7 ± 10.6                                                                       | 0.639   | 2.1 ± 12.8                                                                       | 0.366   | 4.1 ± 13.6                   | 0.161   |
| All | -0.5 ± 28.2                   | -0.424  | -1.0 ± 27.3                                                                      | 0.023   | -0.4 ± 27.3                                                                      | -0.023  | -0.5 ± 28.1                  | -0.341  |
|     | (e) $t\text{Std}_{\text{G}}$  |         | (f) $\Delta\sigma_{\text{H}}, \frac{\Delta\sigma_{\text{H}}}{\sigma_{\text{G}}}$ |         | (g) $\Delta\sigma_{\text{L}}, \frac{\Delta\sigma_{\text{L}}}{\sigma_{\text{G}}}$ |         | (h) $V_{\text{T}}$           |         |
|     | $\epsilon_{\text{Abs}}$ (mL)  | $r$ (1) | $\epsilon_{\text{Abs}}$ (mL)                                                     | $r$ (1) | $\epsilon_{\text{Abs}}$ (mL)                                                     | $r$ (1) | $\epsilon_{\text{Abs}}$ (mL) | $r$ (1) |
| S01 | 18.3 ± 18.6                   | 0.363   | 17.1 ± 15.4                                                                      | 0.884   | 21.6 ± 12.3                                                                      | 0.833   | 15.1 ± 5.5                   | 0.963   |
| S02 | -38.8 ± 11.2                  | -0.186  | -52.4 ± 6.3                                                                      | 0.833   | -39.4 ± 11.6                                                                     | 0.244   | -39.8 ± 9.4                  | 0.898   |
| S03 | -5.2 ± 18.3                   | -0.844  | -8.3 ± 15.2                                                                      | 0.546   | -15.9 ± 27.9                                                                     | -0.684  | -4.4 ± 13.5                  | 0.590   |
| S04 | 28.5 ± 25.2                   | 0.069   | 29.9 ± 22.5                                                                      | 0.815   | 29.9 ± 20.0                                                                      | 0.803   | 25.9 ± 17.1                  | 0.791   |
| S05 | 19.3 ± 25.1                   | -0.600  | 25.0 ± 21.8                                                                      | 0.755   | 23.5 ± 19.5                                                                      | 0.870   | 24.2 ± 12.9                  | 0.954   |
| S06 | -10.0 ± 18.9                  | -0.100  | -8.7 ± 17.2                                                                      | 0.676   | -4.9 ± 18.0                                                                      | 0.302   | -8.6 ± 11.0                  | 0.814   |
| S08 | -11.8 ± 21.5                  | 0.093   | -11.7 ± 19.2                                                                     | 0.650   | -11.5 ± 17.2                                                                     | 0.698   | -18.0 ± 11.8                 | 0.860   |
| S09 | 26.0 ± 16.7                   | 0.649   | 28.1 ± 15.8                                                                      | 0.844   | 22.4 ± 12.8                                                                      | 0.768   | 25.0 ± 10.0                  | 0.907   |
| S10 | 5.6 ± 13.9                    | -0.139  | 5.1 ± 12.3                                                                       | 0.729   | 6.1 ± 11.8                                                                       | 0.543   | 11.9 ± 7.1                   | 0.860   |
| All | (†) -0.5 ± 28.2               | -0.710  | -1.7 ± 30.4                                                                      | -0.365  | (†) -0.4 ± 28.4                                                                  | -0.050  | -0.4 ± 24.7                  | 0.371   |
