# Supplementary material for: Accuracy and reliability of noninvasive stroke volume monitoring via ECG-gated 3D electrical impedance tomography in healthy volunteers
Source: PubMed Central journal article supplement (PMC5786320; doi:10.1371/journal.pone.0191870), 2018-01-26
Supplement: pone.0191870.s010.pdf [file pone.0191870.s010.pdf]

**Table S2.** Subject-specific and overall performance for a selection of eight features (a) to (h) and hypothesis (H2) absolute SV via subject-specific calibration. The performance between  $SV_{\text{EIT}}$  and  $SV_{\text{Ref}}$  is evaluated in terms of absolute error  $\epsilon_{\text{Abs}}$  and correlation coefficient  $r$ . The (†) indicates unrealistic solutions with calibrations coefficients *not* having identical sign for all subjects. Cell shadings indicate whether the acceptance criteria (see methods section) are met (green), not met (red), or met but with unrealistic calibration coefficients (yellow).

|     | (a) $\Delta\sigma_{\text{H}}$ |         | (b) $t\text{Std}_{\text{H}}$ |         | (c) $\Delta\sigma_{\text{L}}$ |         | (d) $t\text{Std}_{\text{L}}$ |         |
|-----|-------------------------------|---------|------------------------------|---------|-------------------------------|---------|------------------------------|---------|
|     | $\epsilon_{\text{Abs}}$ (mL)  | $r$ (1) | $\epsilon_{\text{Abs}}$ (mL) | $r$ (1) | $\epsilon_{\text{Abs}}$ (mL)  | $r$ (1) | $\epsilon_{\text{Abs}}$ (mL) | $r$ (1) |
| S01 | 0.0 ± 16.9                    | 0.456   | 0.0 ± 17.8                   | 0.358   | 0.0 ± 13.3                    | 0.714   | 0.0 ± 16.8                   | 0.467   |
| S02 | 0.0 ± 10.9                    | 0.118   | 0.0 ± 10.9                   | 0.144   | 0.0 ± 11.0                    | 0.070   | 0.0 ± 11.0                   | 0.035   |
| S03 | 0.0 ± 16.1                    | 0.242   | 0.0 ± 16.5                   | 0.102   | 0.0 ± 10.2                    | 0.786   | 0.0 ± 10.9                   | 0.753   |
| S04 | 0.0 ± 20.9                    | 0.563   | 0.0 ± 22.9                   | 0.426   | 0.0 ± 15.7                    | 0.784   | 0.0 ± 23.6                   | 0.358   |
| S05 | 0.0 ± 17.5                    | 0.696   | 0.0 ± 15.3                   | 0.778   | 0.0 ± 24.0                    | 0.172   | 0.0 ± 24.0                   | 0.167   |
| S06 | 0.0 ± 17.8                    | 0.328   | 0.0 ± 17.1                   | 0.417   | 0.0 ± 18.6                    | 0.152   | 0.0 ± 18.1                   | 0.281   |
| S08 | 0.0 ± 14.9                    | 0.720   | 0.0 ± 6.2                    | 0.958   | 0.0 ± 17.2                    | 0.598   | 0.0 ± 18.9                   | 0.482   |
| S09 | 0.0 ± 7.6                     | 0.893   | 0.0 ± 6.0                    | 0.935   | 0.0 ± 15.8                    | 0.356   | 0.0 ± 16.5                   | 0.235   |
| S10 | 0.0 ± 11.2                    | 0.577   | 0.0 ± 10.6                   | 0.639   | 0.0 ± 12.8                    | 0.366   | 0.0 ± 13.5                   | 0.161   |
| All | 0.0 ± 15.2                    | 0.813   | (†) 0.0 ± 14.3               | 0.836   | (†) 0.0 ± 15.8                | 0.796   | (†) 0.0 ± 17.1               | 0.755   |

  

|     | (e) $t\text{Std}_{\text{G}}$ |         | (f) $\Delta\sigma_{\text{H}}, \frac{\Delta\sigma_{\text{H}}}{\sigma_{\text{G}}}$ |         | (g) $\Delta\sigma_{\text{L}}, \frac{\Delta\sigma_{\text{L}}}{\sigma_{\text{G}}}$ |         | (h) $V_{\text{T}}$           |         |
|-----|------------------------------|---------|----------------------------------------------------------------------------------|---------|----------------------------------------------------------------------------------|---------|------------------------------|---------|
|     | $\epsilon_{\text{Abs}}$ (mL) | $r$ (1) | $\epsilon_{\text{Abs}}$ (mL)                                                     | $r$ (1) | $\epsilon_{\text{Abs}}$ (mL)                                                     | $r$ (1) | $\epsilon_{\text{Abs}}$ (mL) | $r$ (1) |
| S01 | 0.0 ± 17.7                   | 0.363   | 0.0 ± 6.8                                                                        | 0.934   | 0.0 ± 6.2                                                                        | 0.946   | 0.0 ± 5.1                    | 0.963   |
| S02 | 0.0 ± 10.8                   | 0.186   | 0.0 ± 5.7                                                                        | 0.855   | 0.0 ± 6.1                                                                        | 0.831   | 0.0 ± 4.8                    | 0.898   |
| S03 | 0.0 ± 8.9                    | 0.844   | 0.0 ± 11.8                                                                       | 0.701   | 0.0 ± 7.8                                                                        | 0.883   | 0.0 ± 13.4                   | 0.590   |
| S04 | 0.0 ± 25.2                   | 0.069   | 0.0 ± 13.9                                                                       | 0.835   | 0.0 ± 13.9                                                                       | 0.834   | 0.0 ± 15.5                   | 0.791   |
| S05 | 0.0 ± 19.5                   | 0.600   | 0.0 ± 9.2                                                                        | 0.925   | 0.0 ± 9.6                                                                        | 0.919   | 0.0 ± 7.3                    | 0.954   |
| S06 | 0.0 ± 18.7                   | 0.100   | 0.0 ± 12.5                                                                       | 0.747   | 0.0 ± 12.8                                                                       | 0.731   | 0.0 ± 10.9                   | 0.814   |
| S08 | 0.0 ± 21.4                   | 0.093   | 0.0 ± 14.2                                                                       | 0.751   | 0.0 ± 15.0                                                                       | 0.719   | 0.0 ± 11.0                   | 0.860   |
| S09 | 0.0 ± 12.9                   | 0.649   | 0.0 ± 5.6                                                                        | 0.943   | 0.0 ± 9.6                                                                        | 0.825   | 0.0 ± 7.1                    | 0.907   |
| S10 | 0.0 ± 13.6                   | 0.139   | 0.0 ± 9.3                                                                        | 0.738   | 0.0 ± 7.6                                                                        | 0.835   | 0.0 ± 7.0                    | 0.860   |
| All | (†) 0.0 ± 16.8               | 0.766   | 0.0 ± 10.4                                                                       | 0.917   | 0.0 ± 10.3                                                                       | 0.920   | 0.0 ± 9.7                    | 0.929   |
