# Supplementary material for: Accuracy and reliability of noninvasive stroke volume monitoring via ECG-gated 3D electrical impedance tomography in healthy volunteers
Source: PubMed Central journal article supplement (PMC5786320; doi:10.1371/journal.pone.0191870), 2018-01-26
Supplement: pone.0191870.s011.pdf [file pone.0191870.s011.pdf]

**Table S3.** Subject-specific and overall performance for a selection of eight features (a) to (h) and hypothesis (H3) relative SV via subject-independent calibration. The performance between  $\Delta SV_{\text{EIT}}$  and  $\Delta SV_{\text{Ref}}$  is evaluated in terms of angular error  $\epsilon_\alpha$  and angular concordance rate CR. The (†) indicates unrealistic solutions with calibrations coefficients *not* having identical sign for all subjects. Cell shadings indicate whether the acceptance criteria (see methods section) are met (green), not met (red), or met but with unrealistic calibration coefficients (yellow).

|     | (a) $\Delta\sigma_{\text{H}}$ |         | (b) tStd <sub>H</sub>        |         | (c) $\Delta\sigma_{\text{L}}$ |         | (d) tStd <sub>L</sub>        |         |
|-----|-------------------------------|---------|------------------------------|---------|-------------------------------|---------|------------------------------|---------|
|     | $\epsilon_{\text{Abs}}$ (mL)  | $r$ (1) | $\epsilon_{\text{Abs}}$ (mL) | $r$ (1) | $\epsilon_{\text{Abs}}$ (mL)  | $r$ (1) | $\epsilon_{\text{Abs}}$ (mL) | $r$ (1) |
| S01 | 7.0 ± 22.0                    | 66.7    | -3.0 ± 23.8                  | 100.0   | -17.5 ± 4.5                   | 100.0   | -21.4 ± 3.7                  | 100.0   |
| S02 | -19.5 ± 24.5                  | 77.8    | -32.9 ± 14.0                 | 28.6    | -6.2 ± 25.5                   | 63.6    | -14.1 ± 18.7                 | 66.7    |
| S03 | -24.7 ± 8.5                   | 80.0    | -27.3 ± 10.1                 | 60.0    | -35.2 ± 6.4                   | 20.0    | -31.7 ± 6.7                  | 60.0    |
| S04 | 3.4 ± 21.5                    | 88.9    | -1.0 ± 23.9                  | 88.9    | -10.5 ± 16.0                  | 100.0   | -15.3 ± 17.2                 | 100.0   |
| S05 | -7.0 ± 18.4                   | 83.3    | 1.1 ± 19.9                   | 100.0   | -11.5 ± 22.5                  | 80.0    | -23.1 ± 12.1                 | 50.0    |
| S06 | -18.2 ± 28.3                  | 63.6    | -10.7 ± 33.4                 | 61.5    | -7.6 ± 20.6                   | 75.0    | -19.1 ± 13.5                 | 66.7    |
| S08 | -22.2 ± 11.5                  | 80.0    | -12.2 ± 11.5                 | 100.0   | -18.4 ± 14.4                  | 50.0    | -23.3 ± 11.5                 | 40.0    |
| S09 | 14.8 ± 15.8                   | 80.0    | 18.5 ± 12.7                  | 80.0    | -16.4 ± 3.4                   | 100.0   | -16.4 ± 4.0                  | 100.0   |
| S10 | 17.9 ± 18.6                   | 77.8    | 19.9 ± 17.7                  | 66.7    | -2.6 ± 24.8                   | 75.0    | 2.7 ± 24.0                   | 80.0    |
| All | -5.3 ± 25.2                   | 76.9    | -4.9 ± 26.5                  | 73.8    | -12.1 ± 20.3                  | 70.4    | -17.4 ± 16.7                 | 70.2    |

  

|     | (e) tStd <sub>G</sub>        |         | (f) $\Delta\sigma_{\text{H}}, \frac{\Delta\sigma_{\text{H}}}{\sigma_{\text{G}}}$ |         | (g) $\Delta\sigma_{\text{L}}, \frac{\Delta\sigma_{\text{L}}}{\sigma_{\text{G}}}$ |         | (h) V <sub>T</sub>           |         |
|-----|------------------------------|---------|----------------------------------------------------------------------------------|---------|----------------------------------------------------------------------------------|---------|------------------------------|---------|
|     | $\epsilon_{\text{Abs}}$ (mL) | $r$ (1) | $\epsilon_{\text{Abs}}$ (mL)                                                     | $r$ (1) | $\epsilon_{\text{Abs}}$ (mL)                                                     | $r$ (1) | $\epsilon_{\text{Abs}}$ (mL) | $r$ (1) |
| S01 | -22.8 ± 0.1                  | 100.0   | 9.1 ± 8.5                                                                        | 100.0   | 9.6 ± 8.2                                                                        | 100.0   | 16.9 ± 8.1                   | 100.0   |
| S02 | -21.1 ± 7.7                  | 85.7    | -6.4 ± 14.9                                                                      | 88.9    | -4.3 ± 15.9                                                                      | 100.0   | -9.3 ± 11.7                  | 88.9    |
| S03 | -19.9 ± 7.7                  | 100.0   | -26.0 ± 2.3                                                                      | 100.0   | -23.3 ± 3.3                                                                      | 100.0   | -27.4 ± 7.2                  | 40.0    |
| S04 | -23.7 ± 5.9                  | 100.0   | 10.6 ± 14.0                                                                      | 87.5    | 6.4 ± 14.3                                                                       | 85.7    | -2.7 ± 15.8                  | 100.0   |
| S05 | -22.1 ± 11.4                 | 50.0    | -11.9 ± 4.6                                                                      | 100.0   | 0.6 ± 26.7                                                                       | 83.3    | -15.7 ± 3.1                  | 100.0   |
| S06 | 0.6 ± 45.7                   | 50.0    | 2.7 ± 20.6                                                                       | 83.3    | 5.4 ± 20.2                                                                       | 84.6    | 2.1 ± 17.7                   | 92.3    |
| S08 | -26.0 ± 9.1                  | 40.0    | -29.3 ± 9.9                                                                      | 40.0    | -35.0 ± 12.1                                                                     | 40.0    | -4.0 ± 15.0                  | 100.0   |
| S09 | -14.4 ± 2.0                  | 100.0   | 0.1 ± 12.9                                                                       | 100.0   | -3.0 ± 14.0                                                                      | 100.0   | -10.4 ± 7.9                  | 100.0   |
| S10 | -16.0 ± 2.0                  | 100.0   | 16.1 ± 19.3                                                                      | 75.0    | 13.4 ± 20.6                                                                      | 71.4    | 21.2 ± 13.5                  | 85.7    |
| All | (†)-15.6 ± 25.7              | 73.3    | -1.9 ± 20.4                                                                      | 83.9    | -1.7 ± 21.7                                                                      | 84.2    | -1.5 ± 18.5                  | 89.8    |
