# Supplementary material for: Accuracy and reliability of noninvasive stroke volume monitoring via ECG-gated 3D electrical impedance tomography in healthy volunteers
Source: PubMed Central journal article supplement (PMC5786320; doi:10.1371/journal.pone.0191870), 2018-01-26
Supplement: pone.0191870.s012.pdf [file pone.0191870.s012.pdf]

**Table S4.** Subject-specific and overall performance for a selection of eight features (a) to (h) and hypothesis (H4) relative SV via subject-specific calibration. The performance between  $\Delta SV_{\text{EIT}}$  and  $\Delta SV_{\text{Ref}}$  is evaluated in terms of angular error  $\epsilon_\alpha$  and angular concordance rate CR. The (†) indicates unrealistic solutions with calibrations coefficients *not* having identical sign for all subjects. Cell shadings indicate whether the acceptance criteria (see methods section) are met (green), not met (red), or met but with unrealistic calibration coefficients (yellow).

|     | (a) $\Delta\sigma_{\text{H}}$ |         | (b) tStd <sub>H</sub>        |         | (c) $\Delta\sigma_{\text{L}}$ |         | (d) tStd <sub>L</sub>        |         |
|-----|-------------------------------|---------|------------------------------|---------|-------------------------------|---------|------------------------------|---------|
|     | $\epsilon_{\text{Abs}}$ (mL)  | $r$ (1) | $\epsilon_{\text{Abs}}$ (mL) | $r$ (1) | $\epsilon_{\text{Abs}}$ (mL)  | $r$ (1) | $\epsilon_{\text{Abs}}$ (mL) | $r$ (1) |
| S01 | -6.2 ± 32.0                   | 66.7    | -24.8 ± 1.6                  | 100.0   | -8.7 ± 11.0                   | 100.0   | -2.6 ± 31.2                  | 33.3    |
| S02 | -3.9 ± 24.9                   | 81.8    | -13.5 ± 15.7                 | 100.0   | -19.3 ± 8.2                   | 100.0   | -19.3 ± 8.2                  | 100.0   |
| S03 | -14.5 ± 17.4                  | 83.3    | -22.3 ± 7.7                  | 80.0    | 3.5 ± 18.7                    | 85.7    | 3.7 ± 19.0                   | 85.7    |
| S04 | 1.7 ± 22.5                    | 88.9    | -0.2 ± 23.7                  | 88.9    | 2.6 ± 17.5                    | 100.0   | -1.5 ± 20.8                  | 100.0   |
| S05 | 0.0 ± 23.4                    | 85.7    | 1.9 ± 21.3                   | 85.7    | -21.0 ± 14.6                  | 75.0    | -9.6 ± 24.9                  | 83.3    |
| S06 | 4.0 ± 24.6                    | 73.7    | 3.6 ± 26.2                   | 66.7    | 10.3 ± 24.1                   | 72.7    | -2.8 ± 19.1                  | 100.0   |
| S08 | 7.0 ± 22.6                    | 87.5    | 3.5 ± 8.0                    | 100.0   | 6.8 ± 21.8                    | 90.0    | 1.4 ± 21.4                   | 100.0   |
| S09 | -4.5 ± 7.1                    | 100.0   | -3.0 ± 3.3                   | 100.0   | -21.4 ± 7.7                   | 100.0   | -23.9 ± 8.1                  | 100.0   |
| S10 | -19.9 ± 16.1                  | 66.7    | -18.2 ± 16.2                 | 66.7    | -25.0 ± 10.6                  | 66.7    | -27.2 ± 4.0                  | 66.7    |
| All | -1.0 ± 23.0                   | 80.9    | (†) -3.9 ± 21.5              | 83.3    | (†) -0.2 ± 22.5               | 84.6    | (†) -5.8 ± 20.4              | 91.5    |

  

|     | (e) tStd <sub>G</sub>        |         | (f) $\Delta\sigma_{\text{H}}, \frac{\Delta\sigma_{\text{H}}}{\sigma_{\text{G}}}$ |         | (g) $\Delta\sigma_{\text{L}}, \frac{\Delta\sigma_{\text{L}}}{\sigma_{\text{G}}}$ |         | (h) V <sub>T</sub>           |         |
|-----|------------------------------|---------|----------------------------------------------------------------------------------|---------|----------------------------------------------------------------------------------|---------|------------------------------|---------|
|     | $\epsilon_{\text{Abs}}$ (mL) | $r$ (1) | $\epsilon_{\text{Abs}}$ (mL)                                                     | $r$ (1) | $\epsilon_{\text{Abs}}$ (mL)                                                     | $r$ (1) | $\epsilon_{\text{Abs}}$ (mL) | $r$ (1) |
| S01 | -22.6 ± 14.2                 | 50.0    | 1.7 ± 8.9                                                                        | 100.0   | 1.5 ± 6.2                                                                        | 100.0   | 1.3 ± 4.8                    | 100.0   |
| S02 | -3.4 ± 25.3                  | 81.8    | -1.0 ± 16.5                                                                      | 88.9    | -6.3 ± 20.0                                                                      | 87.5    | -2.5 ± 15.1                  | 88.9    |
| S03 | -4.1 ± 7.2                   | 100.0   | -7.0 ± 18.7                                                                      | 83.3    | -1.0 ± 12.8                                                                      | 100.0   | -1.7 ± 25.7                  | 85.7    |
| S04 | 3.4 ± 24.5                   | 81.8    | 0.4 ± 15.0                                                                       | 100.0   | 0.8 ± 15.0                                                                       | 100.0   | -1.0 ± 16.0                  | 100.0   |
| S05 | 10.9 ± 29.2                  | 60.0    | -4.2 ± 10.3                                                                      | 100.0   | -1.1 ± 6.0                                                                       | 100.0   | -2.6 ± 6.4                   | 100.0   |
| S06 | 10.2 ± 23.3                  | 75.0    | 5.4 ± 19.4                                                                       | 84.6    | 5.4 ± 20.8                                                                       | 83.3    | 1.8 ± 17.0                   | 92.3    |
| S08 | -2.2 ± 23.1                  | 60.0    | 10.7 ± 22.1                                                                      | 77.8    | 8.3 ± 18.9                                                                       | 90.0    | 4.6 ± 12.9                   | 100.0   |
| S09 | -14.4 ± 9.5                  | 100.0   | -1.2 ± 2.4                                                                       | 100.0   | -6.6 ± 15.5                                                                      | 100.0   | -0.4 ± 9.0                   | 100.0   |
| S10 | -26.2 ± 4.5                  | 66.7    | -14.7 ± 16.9                                                                     | 66.7    | -1.7 ± 17.0                                                                      | 100.0   | -8.4 ± 13.3                  | 100.0   |
| All | (†) 2.0 ± 24.2               | 74.4    | 1.0 ± 17.5                                                                       | 87.7    | 1.3 ± 16.7                                                                       | 93.0    | -0.4 ± 15.3                  | 94.7    |
